# Supplementary material
Source: MDPI journal article supplement (https://www.mdpi.com/2308-3417/5/4/70)
Supplement: s1 [file s1]

Archive with 2 entries (2 files):
- CV.pdf
- informed consent paper.pdf
