# Supplementary material
Source: MDPI journal article supplement (https://www.mdpi.com/2308-3417/5/4/70)
Supplement: s1 [file s1 › CV.pdf]

[Fumi Mizuhashi]

- 2000 Graduate from The Nippon Dental University School of Dentistry at Niigata
- 2004 Completed doctoral course in The Nippon Dental University Graduate School of Life Dentistry at Niigata (Dentistry doctor)  
Assistant of Department of Complete denture, The Nippon Dental University School of Dentistry at Niigata
- 2006 Lecturer of Department of Complete denture, The Nippon Dental University School of Life Dentistry at Niigata
- 2009 Lecturer of Department of Removable Prosthodontics, The Nippon Dental University School of Life Dentistry at Niigata
- 2013- Associate Professor of Department of Removable Prosthodontics, The Nippon Dental University School of Life Dentistry at Niigata

[Takao Morita]

- 1990 Graduated from Department of Biology, Faculty of Science, Niigata University
- 1992 Finished from Master Course, Graduate School of Science, Niigata University
- 1997 Finished from Doctor Course, Graduate school of Medicine, The University of Tokyo
- 2000 Assistant professor of Department of Pharmacology, School of Dentistry, Health Sciences University of Hokkaido
- 2008 Lecturer of Division of Pharmacology, Department of Oral Biology, School of Dentistry, Health Sciences University of Hokkaido
- 2017 Associate Professor of Department of Biochemistry, The Nippon Dental University School of Life Dentistry at Niigata
- 2019 Professor of Department of Biochemistry, The Nippon Dental University School of Life Dentistry at Niigata

[Shuji Toya]

- 1992 Graduate from The Nippon Dental University School of Dentistry at Niigata
- 1996 Completed doctoral course in The Nippon Dental University Graduate School of Life Dentistry at Niigata (Dentistry doctor)
- 1997 Assistant of Department of Oral and Maxillofacial Surgery, The Nippon Dental University School of Dentistry at Niigata
- 2003 Lecturer of Department of Oral and Maxillofacial Surgery, The Nippon Dental University Niigata Hospital
- 2011 Associate Professor of Department of Oral and Maxillofacial Surgery, The Nippon Dental University Niigata Hospital
- 2020- Professor of Department of Oral and Maxillofacial Surgery, The Nippon Dental University Niigata Hospital

[Ritsuko Sato]

- 1980 Graduate from Toho University Faculty of Science
- 1980 Researcher of Kotobiken Medical Laboratories
- 1981 Assistant of Department of pathology, The Nippon Dental University School of Dentistry at Niigata
- 2005 Lecturer of Department of Dental Hygiene, The Nippon Dental University College at Niigata
- 2008- Associate Professor of Department of Dental Hygiene, The Nippon Dental University College at Niigata

[Kaoru Koide]

- 1979 Graduate from The Nippon Dental University School of Dentistry at Niigata
- 1983 Completed doctoral course in The Nippon Dental University Graduate School of Life Dentistry at Niigata (Dentistry doctor)
- 1984 Lecturer of Department of Removable Prosthodontics, The Nippon Dental University School of Dentistry at Niigata
- 1988 Visiting professor of Department of Prosthodontics, University of Toronto Faculty of Dentistry (~2006)
- 1989 Associate Professor of Department of Removable Prosthodontics, The Nippon Dental University School of Dentistry at Niigata
- 1998- Professor of Department of Removable Prosthodontics, The Nippon Dental University School of Life Dentistry at Niigata

[Yuko Watarai]

- 2013 Graduate from The Nippon Dental University School of Dentistry at Niigata
- 2014 Completed clinical practice program in The Nippon Dental University Niigata Hospital
- 2018 Completed doctoral course in The Nippon Dental University Graduate School of Life Dentistry at Niigata (Dentistry doctor)  
Part-time Dentist of Comprehensive Dental Care, The Nippon Dental University Niigata Hospital
- 2019 Assistant professor of Comprehensive Dental Care, The Nippon Dental University Niigata Hospital
- 2020- Assistant professor of Department of Removable Prosthodontics, The Nippon Dental University School of Life Dentistry at Niigata
