# Supplementary material
Source: MDPI journal article supplement (https://www.mdpi.com/2308-3417/5/4/70)
Supplement: s1 [file s1 › informed consent paper.pdf]

## 承諾書

研究課題：口腔乾燥症患者の唾液分析

内 容：唾液、舌苔等の成分を分析して口腔乾燥で生じる変化を調べることを目的として、唾液、舌苔等の採取を行います。

研究対象者となることにより

期待される利益：ご自身の唾液成分が分かります。

起こり得る危険：特に発生しません。

伴う不快な状態：特にありません。

個人情報：個人情報の保護には万全を期して取扱います。また、本研究結果を公表するに際して個人が特定されることはありません。

協力の拒否：本研究にご協力いただけても、治療等で不利益を受けることは一切ありません。また、承諾後でも研究への参加をいつでも取りやめることができます。

費 用：本研究により特別料金が発生することはありません。

なお、この研究は日本歯科大学新潟生命歯学部倫理委員会において承認されていることを申し述べさせていただきます。

主任研究者 所属・職階・氏名

歯科補綴学第1講座・准教授

水橋 史

説明者

平成

年

月

日

所属・職階：歯科補綴学第1講座・准教授

氏 名：水橋 史

印

以上の説明を理解しましたので、上記研究に協力することを承諾いたします。

平成

年

月

日

氏 名：

保護者氏名：

(必要な場合)
